# Supplementary material
Source: Research Square preprint supplement (doi:10.21203/rs.3.rs-9077295/v1)
Supplement: Supplementary file 1 [file 376cb3284470998c58e982a8.docx]

|  | **Deaths (n)** | | | | | | | | |
| --- | --- | --- | --- | --- | --- | --- | --- | --- | --- |
| **Year** | **Overall** | **Male** | **Female** | **Hispanics** | **NH Asians** | **NH American** | **NH Blacks** | **NH white** | **population** |
| 1999 | 7422 | 3129 | 4293 | 422 | 159 | 31 | 1953 | 4839 | 34797841 |
| 2000 | 6687 | 2962 | 3725 | 520 | 220 | 41 | 1740 | 4146 | 34991753 |
| 2001 | 6845 | 3038 | 3807 | 600 | 245 | 44 | 1744 | 4200 | 35290291 |
| 2002 | 7283 | 3276 | 4007 | 639 | 261 | 51 | 1817 | 4495 | 35522207 |
| 2003 | 7816 | 3509 | 4307 | 659 | 278 | 55 | 2027 | 4771 | 35863529 |
| 2004 | 8074 | 3767 | 4307 | 725 | 312 | 51 | 2169 | 4795 | 36203319 |
| 2005 | 8616 | 3925 | 4691 | 864 | 338 | 57 | 2230 | 5109 | 36649798 |
| 2006 | 13740 | 6033 | 7707 | 1110 | 478 | 88 | 3048 | 8994 | 37164107 |
| 2007 | 13643 | 6018 | 7625 | 1140 | 528 | 84 | 3014 | 8861 | 37825711 |
| 2008 | 13509 | 6106 | 7403 | 1181 | 542 | 66 | 2960 | 8734 | 38777621 |
| 2009 | 13642 | 6147 | 7495 | 1228 | 564 | 72 | 2899 | 8857 | 39623175 |
| 2010 | 13815 | 6283 | 7532 | 1324 | 631 | 95 | 2903 | 8843 | 40267984 |
| 2011 | 9339 | 3931 | 5408 | 642 | 358 | 44 | 1582 | 6703 | 41394141 |
| 2012 | 9372 | 3958 | 5414 | 644 | 292 | 41 | 1561 | 6814 | 43145356 |
| 2013 | 36153 | 16650 | 19503 | 2524 | 1239 | 193 | 5575 | 26555 | 44704074 |
| 2014 | 37967 | 17612 | 20355 | 2799 | 1283 | 180 | 5742 | 27885 | 46243211 |
| 2015 | 40897 | 19066 | 21831 | 3056 | 1480 | 206 | 6226 | 29805 | 47760852 |
| 2016 | 43628 | 20490 | 23138 | 3310 | 1633 | 236 | 6716 | 31630 | 49244195 |
| 2017 | 47429 | 22209 | 25220 | 3668 | 1808 | 246 | 7063 | 34557 | 50858679 |
| 2018 | 50045 | 23732 | 26313 | 4024 | 1918 | 249 | 7110 | 36635 | 52431193 |
| 2019 | 54214 | 25670 | 28544 | 4273 | 2020 | 285 | 7867 | 39667 | 54058263 |
| 2020 | 69681 | 33202 | 36479 | 5979 | 2712 | 378 | 10902 | 49601 | 55659365 |
| **Total** | 519817 | 240713 | 279104 | 41331 | 19299 | 2793 | 88848 | 366496 | 928476665 |

**Supplement table 1. Overall, Sex and Race/Ethnicity-stratified Absolute Number of Deaths due to Hypertensive Nephrosclerosis in Older Adults (≥65) in the United States from 1999 to 2020**

NH: Non-Hispanic

**Supplement table 2.** **Absolute Number of Deaths due to Hypertensive Nephrosclerosis in Older Adults (≥65) stratified by Census Region and Urbanization in the United States from 1999 to 2020**

| **Deaths (n)** | | | | | | |
| --- | --- | --- | --- | --- | --- | --- |
| **Year** | **Metropolitan** | **Non-metropolitan** | **Northeast** | **Midwest** | **South** | **West** |
| 1999 | 5984 | 1438 | 1257 | 1662 | 3229 | 1274 |
| 2000 | 5701 | 986 | 1139 | 1339 | 2662 | 1547 |
| 2001 | 5795 | 1050 | 1182 | 1399 | 2719 | 1545 |
| 2002 | 6181 | 1102 | 1278 | 1455 | 2875 | 1675 |
| 2003 | 6572 | 1244 | 1265 | 1613 | 3136 | 1802 |
| 2004 | 6803 | 1271 | 1381 | 1619 | 3244 | 1830 |
| 2005 | 7305 | 1311 | 1306 | 1762 | 3557 | 1991 |
| 2006 | 11420 | 2320 | 2143 | 3076 | 5323 | 3198 |
| 2007 | 11153 | 2490 | 2227 | 3071 | 5169 | 3176 |
| 2008 | 11163 | 2346 | 2051 | 3021 | 5202 | 3235 |
| 2009 | 11214 | 2428 | 2184 | 3013 | 5202 | 3243 |
| 2010 | 11305 | 2510 | 2258 | 2960 | 5270 | 3327 |
| 2011 | 7634 | 1705 | 1389 | 2208 | 3190 | 2552 |
| 2012 | 7735 | 1637 | 1392 | 2057 | 3354 | 2569 |
| 2013 | 29342 | 6811 | 5705 | 8472 | 12725 | 9251 |
| 2014 | 31100 | 6867 | 5891 | 8794 | 13659 | 9623 |
| 2015 | 33368 | 7529 | 6150 | 9721 | 14418 | 10608 |
| 2016 | 35630 | 7998 | 6465 | 10137 | 15873 | 11153 |
| 2017 | 38664 | 8765 | 6827 | 11122 | 17284 | 12196 |
| 2018 | 40692 | 9353 | 7389 | 11518 | 18488 | 12650 |
| 2019 | 43944 | 10270 | 7799 | 12388 | 20684 | 13343 |
| 2020 | 56468 | 13213 | 10259 | 16455 | 26604 | 16363 |
| **Total** | 425173 | 94644 | 78937 | 118862 | 193867 | 128151 |

**Supplement table 3.** **Absolute Number of Deaths due to Hypertensive Nephrosclerosis in Older Adults (≥65) stratified by Ten-year age groups in the United States from 1999 to 2020**

| **Deaths (n)** | | | |
| --- | --- | --- | --- |
| **Year** | **65-74 years** | **75-84 years** | **85+ years** |
| 1999 | 2033 | 3065 | 2324 |
| 2000 | 2213 | 2789 | 1685 |
| 2001 | 2170 | 2932 | 1743 |
| 2002 | 2388 | 3147 | 1748 |
| 2003 | 2473 | 3381 | 1962 |
| 2004 | 2597 | 3471 | 2006 |
| 2005 | 2736 | 3712 | 2168 |
| 2006 | 3407 | 5438 | 4895 |
| 2007 | 3379 | 5201 | 5063 |
| 2008 | 3359 | 5077 | 5073 |
| 2009 | 3429 | 5060 | 5153 |
| 2010 | 3483 | 5042 | 5290 |
| 2011 | 1481 | 3023 | 4835 |
| 2012 | 1475 | 2928 | 4969 |
| 2013 | 6108 | 11424 | 18621 |
| 2014 | 6657 | 11799 | 19511 |
| 2015 | 7261 | 12501 | 21135 |
| 2016 | 7982 | 13294 | 22352 |
| 2017 | 8608 | 14222 | 24599 |
| 2018 | 9181 | 15223 | 25641 |
| 2019 | 10143 | 16500 | 27571 |
| 2020 | 13348 | 21632 | 34701 |
| **Total** | 105911 | 170861 | 243045 |

**Supplement table 4. Overall and Sex-stratified Age-adjusted Mortality Rates (AAMRs) per 100,000 Individuals for Hypertensive Nephrosclerosis in Older Adults in the United States from 1999 to 2020**

| **Age-Adjusted Rate (95% CI)** | | | |
| --- | --- | --- | --- |
| **Year** | **Male** | **Female** | **Overall** |
| 1999 | 24.535 (23.65-25.41) | 19.99 (19.39–20.59) | 21.51 (21.02–22.00) |
| 2000 | 22.325 (21.50-23.14) | 17.50 (16.93–18.06) | 19.16 (18.70–19.62) |
| 2001 | 22.678 (21.85-23.49) | 17.76 (17.20–18.33) | 19.39 (18.93–19.85) |
| 2002 | 23.752 (22.92-24.57) | 18.61 (18.03–19.19) | 20.46 (19.99–20.93) |
| 2003 | 25.196 (24.35- 26.04) | 19.81 (19.22–20.41) | 21.68 (21.20–22.17) |
| 2004 | 26.516 (25.66- 27.37) | 19.73 (19.14–20.32) | 22.15 (21.66–22.63) |
| 2005 | 26.924 (26.07- 27.77) | 21.19 (20.58–21.80) | 23.32 (22.83–23.81) |
| 2006 | 41.479 (40.42- 42.53) | 33.35 (32.60–34.10) | 36.32 (35.71–36.92) |
| 2007 | 40.327 (39.30- 41.35) | 32.39 (31.66–33.12) | 35.41 (34.81–36.00) |
| 2008 | 39.907 (38.89- 40.91) | 31.00 (30.28–31.71) | 34.31 (33.73–34.89) |
| 2009 | 39.091 (38.10- 40.07) | 30.85 (30.14–31.56) | 33.99 (33.42–34.57) |
| 2010 | 39.214 (38.23- 40.19) | 30.57 (29.87–31.27) | 33.87 (33.31–34.44) |
| 2011 | 24.186 (23.42- 24.94) | 20.47 (19.92–21.03) | 21.92 (21.47–22.37) |
| 2012 | 23.57 (22.83- 24.30) | 20.04 (19.49–20.58) | 21.39 (20.95–21.82) |
| 2013 | 95.442 (93.98- 96.90) | 70.70 (69.69–71.71) | 80.63 (79.80–81.47) |
| 2014 | 97.803 (96.34- 99.25) | 72.41 (71.40–73.42) | 82.60 (81.76–83.44) |
| 2015 | 102.717 (101.24-104.18) | 76.29 (75.26–77.32) | 86.91 (86.06–87.76) |
| 2016 | 107.258 (105.77-108.74) | 79.23 (78.19–80.27) | 90.70 (89.84–91.56) |
| 2017 | 112.811 (111.31-114.30) | 84.58 (83.52–85.64) | 96.13 (95.26–97.00) |
| 2018 | 116.627 (115.13-118.12) | 86.38 (85.33–87.44) | 98.89 (98.02–99.77) |
| 2019 | 122.47 (120.95-123.98) | 92.02 (90.94–93.09) | 104.69 (103.81–105.58) |
| 2020 | 154.075 (152.40-155.75) | 116.04 (114.84-117.24) | 132.03 (131.05–133.02) |
| **Total** | 67.557 (67.28-67.82) | 48.92 (48.74-49.10) | 56.07 (55.92–56.22) |

**Supplement table 5. Race and Ethnicity-stratified** **Age-adjusted Mortality Rates (AAMRs) per 100,000 Individuals for Hypertensive Nephrosclerosis in Older Adults in the United States from 1999 to 2020**

|  | **Age-Adjusted Mortality Rates (95% Confidence Intervals)** | | | | |
| --- | --- | --- | --- | --- | --- |
| Year | Hispanic or Latino | NH American | NH White | NH Blacks | NH Asians |
| 1999 | 28.17 (25.42-30.92) | 26.78 (17.94–38.47) | 16.35 (15.89-16.81) | 72.25 (69.03-75.47) | 23.44 (19.69-27.20) |
| 2000 | 32.64 (29.77-35.51) | 30.93 (22.10–42.12) | 13.91 (13.49-14.34) | 62.84 (59.88-65.81) | 29.17 (25.22-33.13) |
| 2001 | 35.29 (32.41-38.17) | 32.71 (23.57–44.21) | 14.01 (13.59-14.44) | 62.16 (59.23-65.09) | 29.95 (26.11-33.78) |
| 2002 | 35.03 (32.26-37.80) | 35.38 (26.17–46.78) | 14.88 (14.45-15.32) | 64.13 (61.17-67.09) | 30.12 (26.39-33.85) |
| 2003 | 34.80 (32.10-37.51) | 38.34 (28.63–50.28) | 15.67 (15.23-16.12) | 70.49 (67.41-73.58) | 30.61 (26.94-34.28) |
| 2004 | 36.32 (33.63-39.01) | 32.74 (24.22–43.29) | 15.63 (15.19-16.08) | 74.18 (71.04-77.32) | 32.01 (28.39-35.62) |
| 2005 | 41.41 (38.60-44.21) | 36.14 (27.15–47.16) | 16.48 (16.03-16.93) | 74.86 (71.74-77.99) | 32.83 (29.28-36.39) |
| 2006 | 52.17 (49.06-55.29) | 58.32 (46.45–72.30) | 28.29 (27.71-28.88) | 102.40 (98.74-106.05) | 44.38 (40.34-48.41) |
| 2007 | 50.94 (47.95-53.94) | 51.88 (41.07–64.65) | 27.39 (26.82-27.96) | 98.72 (95.18-102.27) | 47.36 (43.28-51.45) |
| 2008 | 50.66 (47.74-53.58) | 38.52 (29.60–49.28) | 26.58 (26.02-27.14) | 94.52 (91.09-97.94) | 45.62 (41.74-49.50) |
| 2009 | 49.34 (46.55-52.13) | 42.70 (33.16–54.13) | 26.59 (26.03-27.14) | 90.53 (87.21-93.85) | 45.02 (41.27-48.77) |
| 2010 | 51.35 (48.55-54.14) | 52.67 (42.30–64.82) | 26.17 (25.62-26.72) | 88.54 (85.29-91.78) | 48.25 (44.46-52.05) |
| 2011 | 23.93 (22.07-25.80) | 25.49 (18.37–34.46) | 19.01 (18.55-19.47) | 47.47 (45.12-49.83) | 25.69 (23.01-28.36) |
| 2012 | 22.60 (20.84-24.36) | 21.74 (15.46–29.72) | 18.89 (18.44-19.34) | 45.10 (42.84-47.35) | 19.55 (17.30-21.80) |
| 2013 | 83.32 (80.05-86.59) | 98.33(84.15–112.50) | 72.44 (71.56-73.32) | 154.77 (150.67-158.87) | 76.00 (71.74-80.26) |
| 2014 | 86.54 (83.31-89.77) | 86.27 (73.41–99.14) | 74.90 (74.02-75.79) | 153.05 (149.05-157.05) | 72.54 (68.54-76.53) |
| 2015 | 88.54 (85.37-91.70) | 91.38 (78.62–104.15) | 78.78 (77.88-79.69) | 159.27 (155.27-163.27) | 77.59 (73.61-81.57) |
| 2016 | 90.79 (87.67-93.91) | 98.10 (85.29–110.91) | 82.40 (81.48-83.32) | 165.93 (161.91-169.95) | 81.28 (77.31-85.24) |
| 2017 | 94.76 (91.66-97.86) | 97.77 (85.30–110.24) | 88.44 (87.50-89.38) | 168.23 (164.26-172.21) | 83.49 (79.61-87.36) |
| 2018 | 99.07 (95.98-102.16) | 91.01 (79.46–102.56) | 92.06 (91.11-93.01) | 162.51 (158.68-166.34) | 83.44 (79.68-87.20) |
| 2019 | 101.33 (98.26-104.39) | 101.35 (89.36–113.33) | 98.01 (97.04-98.98) | 173.50 (169.61-177.39) | 83.25 (79.60-86.91) |
| 2020 | 135.00 (131.54-138.45) | 121.97 (109.40–134.54) | 121.26 (120.18-122.33) | 231.82 (227.40-236.25) | 105.20 (101.21-109.19) |
| Total | 70.21 (69.53-70.90) | 68.08 (65.49–70.66) | 48.11 (47.95-48.26) | 117.99 (117.21-118.77) | 61.96 (61.08-62.84) |

NH: Non-Hispanic

**Supplement table 6.** **Age-adjusted Mortality Rates (AAMRs) per 100,000 Individuals for Hypertensive Nephrosclerosis in Older Adults stratified by Urbanization in the United States from 1999 to 2020**

| **Age-Adjusted Rate (95% CI)** | | |
| --- | --- | --- |
| **Year** | **Metropolitan** | **Nonmetropolitan** |
| 1999 | 21.54 (20.99-22.08) | 21.49 (20.38-22.61) |
| 2000 | 20.20 (19.68-20.73) | 14.70 (13.78-15.62) |
| 2001 | 20.29 (19.77-20.81) | 15.58 (14.63-16.52) |
| 2002 | 21.43 (20.90-21.96) | 16.28 (15.31-17.24) |
| 2003 | 22.47 (21.93-23.01) | 18.23 (17.21-19.24) |
| 2004 | 22.99 (22.44-23.53) | 18.52 (17.50-19.54) |
| 2005 | 24.29 (23.73-24.85) | 18.99 (17.96-20.02) |
| 2006 | 37.16 (36.48-37.84) | 32.85 (31.52-34.19) |
| 2007 | 35.51 (34.85-36.17) | 34.83 (33.46-36.20) |
| 2008 | 34.76 (34.12-35.41) | 32.44 (31.13-33.76) |
| 2009 | 34.17 (33.53-34.80) | 33.28 (31.95-34.60) |
| 2010 | 33.90 (33.27-34.53) | 33.86 (32.53-35.19) |
| 2011 | 21.81 (21.32-22.30) | 22.51 (21.43-23.58) |
| 2012 | 21.46 (20.98-21.94) | 21.11 (20.09-22.14) |
| 2013 | 79.38 (78.46-80.29) | 86.63 (84.57-88.70) |
| 2014 | 81.93 (81.01-82.84) | 85.87 (83.83-87.91) |
| 2015 | 85.70 (84.77-86.62) | 92.54 (90.44-94.64) |
| 2016 | 89.32 (88.38-90.25) | 97.36 (95.21-99.50) |
| 2017 | 94.47 (93.52-95.42) | 104.33 (102.14-106.53) |
| 2018 | 96.79 (95.84-97.74) | 109.23 (107.01-111.46) |
| 2019 | 102.09 (101.13-103.05) | 117.90 (115.61-120.19) |
| 2020 | 128.44 (127.38-129.51) | 150.01 (147.44-152.57) |
| **Total** | 55.93 (55.76-56.10) | 56.87 (56.51-57.23) |

**Supplement table 7.** **Age-adjusted Mortality Rates (AAMRs) per 100,000 Individuals for Hypertensive Nephrosclerosis in Older Adults stratified by Census Region in the United States from 1999 to 2020**

| **Age-Adjusted Rate (95% CI)** | | | | |
| --- | --- | --- | --- | --- |
| **Year** | **Northeast** | **Midwest** | **South** | **West** |
| 1999 | 16.98 (16.04-17.92) | 19.91 (18.95-20.87) | 26.84 (25.91-27.76) | 18.98 (17.94-20.03) |
| 2000 | 15.31 (14.42-16.20) | 16.01 (15.15-16.87) | 21.70 (20.88-22.53) | 22.58 (21.45-23.71) |
| 2001 | 15.78 (14.88-16.68) | 16.57 (15.70-17.44) | 21.91 (21.09-22.74) | 22.04 (20.94-23.14) |
| 2002 | 16.99 (16.06-17.92) | 17.23 (16.34-18.12) | 22.93 (22.10-23.77) | 23.52 (22.39-24.65) |
| 2003 | 16.64 (15.72-17.56) | 18.86 (17.94-19.78) | 24.65 (23.78-25.51) | 24.82 (23.67-25.96) |
| 2004 | 18.16 (17.20-19.12) | 18.84 (17.92-19.76) | 25.14 (24.28-26.01) | 24.78 (23.65-25.92) |
| 2005 | 17.09 (16.16-18.02) | 20.29 (19.34-21.24) | 27.09 (26.20-27.98) | 26.33 (25.18-27.49) |
| 2006 | 27.17 (26.01-28.32) | 34.39 (33.17-35.61) | 39.90 (38.83-40.97) | 41.29 (39.86-42.72) |
| 2007 | 27.91 (26.75-29.08) | 33.93 (32.73-35.14) | 37.95 (36.91-38.98) | 39.95 (38.56-41.34) |
| 2008 | 25.40 (24.30-26.51) | 32.82 (31.64-33.99) | 37.28 (36.26-38.29) | 39.51 (38.15-40.88) |
| 2009 | 26.70 (25.57-27.83) | 32.45 (31.29-33.62) | 36.42 (35.43-37.41) | 38.57 (37.24-39.91) |
| 2010 | 27.17 (26.04-28.30) | 31.35 (30.21-32.49) | 36.18 (35.20-37.16) | 38.81 (37.49-40.14) |
| 2011 | 15.90 (15.05-16.74) | 22.36 (21.42-23.31) | 21.23 (20.49-21.96) | 28.26 (27.15-29.36) |
| 2012 | 15.64 (14.80-16.47) | 20.33 (19.45-21.22) | 21.64 (20.90-22.37) | 27.32 (26.25-28.38) |
| 2013 | 63.14 (61.47-64.80) | 82.66 (80.88-84.44) | 79.47 (78.08-80.86) | 96.08 (94.11-98.05) |
| 2014 | 64.49 (62.82-66.17) | 84.16 (82.38-85.94) | 82.68 (81.28-84.07) | 96.73 (94.78-98.68) |
| 2015 | 66.59 (64.89-68.28) | 91.84 (90.00-93.69) | 84.58 (83.19-85.97) | 103.17 (101.19-105.15) |
| 2016 | 68.89 (67.19-70.60) | 94.84 (92.97-96.71) | 90.45 (89.03-91.86) | 105.48 (103.51-107.46) |
| 2017 | 70.71 (69.01-72.41) | 101.60 (99.69-103.51) | 95.99 (94.55-97.43) | 112.92 (110.90-114.94) |
| 2018 | 75.30 (73.57-77.04) | 103.47 (101.56-105.37) | 99.25 (97.81-100.69) | 113.64 (111.65-115.64) |
| 2019 | 78.29 (76.54-80.05) | 109.45 (107.51-111.39) | 107.97 (106.50-109.45) | 116.85 (114.85-118.84) |
| 2020 | 102.28 (100.29-104.28) | 144.21 (141.99-146.43) | 135.17 (133.54-136.81) | 139.58 (137.43-141.73) |
| **Total** | 41.85 (41.56-42.15) | 55.57 (55.25-55.89) | 58.66 (58.40-58.92) | 65.70 (65.34-66.07) |

**Supplement table 8.** **Crude Mortality Rates (CMRs) per 100,000 Individuals for Hypertensive Nephrosclerosis in Older Adults stratified by Ten-year Age Groups in the United States from 1999 to 2020**

| **Crude Rates (95% CI)** | | | |
| --- | --- | --- | --- |
| **Year** | **65-74 years** | **75-84 years** | **85+ years** |
| 1999 | 26.78 (17.94-38.47) | 25.07 (24.18-25.95) | 55.94 (53.67-58.22) |
| 2000 | 30.93 (22.10-42.12) | 22.56 (21.72-23.40) | 39.74 (37.84-41.64) |
| 2001 | 32.71 (23.57-44.21) | 23.28 (22.43-24.12) | 40.41 (38.52-42.31) |
| 2002 | 35.38 (26.17-46.78) | 24.65 (23.79-25.51) | 40.01 (38.13-41.88) |
| 2003 | 38.34 (28.63-50.28) | 26.21 (25.33-27.10) | 43.93 (41.98-45.87) |
| 2004 | 32.74 (24.22-43.29) | 26.72 (25.83-27.61) | 44.12 (42.19-46.05) |
| 2005 | 36.14 (27.15-47.16) | 28.39 (27.47-29.30) | 46.19 (44.24-48.13) |
| 2006 | 58.32 (46.45-72.30) | 41.52 (40.42-42.63) | 100.59 (97.77-103.41) |
| 2007 | 51.88 (41.07-64.65) | 39.74 (38.66-40.82) | 100.46 (97.69-103.23) |
| 2008 | 38.52 (29.60-49.28) | 38.82 (37.75-39.89) | 97.63 (94.94-100.32) |
| 2009 | 42.70 (33.16-54.14) | 38.85 (37.78-39.92) | 96.00 (93.38-98.62) |
| 2010 | 52.67 (42.30-64.82) | 38.60 (37.53-39.66) | 96.29 (93.70-98.89) |
| 2011 | 25.49 (18.37-34.46) | 22.94 (22.12-23.76) | 84.27 (81.89-86.65) |
| 2012 | 21.74 (15.46-29.72) | 22.06 (21.26-22.85) | 84.40 (82.05-86.74) |
| 2013 | 98.33 (84.15-112.50) | 84.95 (83.40-86.51) | 308.25 (303.82-312.68) |
| 2014 | 86.27 (73.41-99.14) | 86.23 (84.67-87.78) | 316.62 (312.18-321.06) |
| 2015 | 91.39 (78.62-104.15) | 89.78 (88.21-91.36) | 336.16 (331.62-340.69) |
| 2016 | 98.10 (85.29-110.91) | 93.39 (91.81-94.98) | 350.32 (345.73-354.91) |
| 2017 | 97.77 (85.30-110.25) | 96.70 (95.11-98.29) | 380.27 (375.52-385.03) |
| 2018 | 91.01 (79.46-102.56) | 98.88 (97.31-100.45) | 391.79 (386.99-396.59) |
| 2019 | 101.35 (89.36-113.33) | 103.32 (101.74-104.89) | 417.42 (412.50-422.35) |
| 2020 | 121.97 (109.40-134.54) | 131.48 (129.73-133.24) | 521.16 (515.67-526.64) |
| **Total** | 68.08 (65.49-70.66) | 57.23 (56.96-57.51) | 203.36 (202.55-204.17) |

**Supplement table 9. Age-adjusted Mortality Rates (AAMRs) per 100,000 Individuals for Hypertensive Nephrosclerosis in Older Adults (≥65) stratified by States in the United States, 1999 to 2020**

| **State** | **Age Adjusted Rate** | **Rank** | **Percent** |
| --- | --- | --- | --- |
| District of Columbia | 85.8 | 1 | 100.00% |
| Minnesota | 78.68 | 2 | 98.00% |
| Texas | 76.07 | 3 | 96.00% |
| California | 74.78 | 4 | 94.00% |
| Tennessee | 74.64 | 5 | 92.00% |
| Oklahoma | 73.82 | 6 | 90.00% |
| Mississippi | 72.98 | 7 | 88.00% |
| Nebraska | 72.46 | 8 | 86.00% |
| South Carolina | 71.53 | 9 | 84.00% |
| South Dakota | 70.38 | 10 | 82.00% |
| Vermont | 67.1 | 11 | 80.00% |
| Maryland | 66.67 | 12 | 78.00% |
| Washington | 64.78 | 13 | 76.00% |
| Indiana | 64.31 | 14 | 74.00% |
| Iowa | 63.88 | 15 | 72.00% |
| Oregon | 63.7 | 16 | 70.00% |
| Ohio | 63.39 | 17 | 68.00% |
| Colorado | 62.34 | 18 | 66.00% |
| Arizona | 61.17 | 19 | 64.00% |
| North Dakota | 60.63 | 20 | 62.00% |
| West Virginia | 59.37 | 21 | 60.00% |
| Wisconsin | 58.38 | 22 | 58.00% |
| Louisiana | 57.71 | 23 | 56.00% |
| North Carolina | 56.77 | 24 | 54.00% |
| Idaho | 54.82 | 25 | 52.00% |
| Hawaii | 53.7 | 26 | 50.00% |
| Rhode Island | 52.93 | 27 | 48.00% |
| Kentucky | 51.07 | 28 | 46.00% |
| Arkansas | 48.4 | 29 | 44.00% |
| Florida | 47.93 | 30 | 42.00% |
| Michigan | 47.91 | 31 | 40.00% |
| Georgia | 47.51 | 32 | 38.00% |
| New York | 46.51 | 33 | 36.00% |
| Virginia | 45.69 | 34 | 34.00% |
| Missouri | 44.45 | 35 | 32.00% |
| New Mexico | 43.74 | 36 | 30.00% |
| New Jersey | 42.82 | 37 | 28.00% |
| Pennsylvania | 42.76 | 38 | 26.00% |
| Alaska | 42.71 | 39 | 24.00% |
| Wyoming | 42.4 | 40 | 22.00% |
| Delaware | 41.98 | 41 | 20.00% |
| New Hampshire | 41.82 | 42 | 18.00% |
| Illinois | 40.83 | 43 | 16.00% |
| Nevada | 39.25 | 44 | 14.00% |
| Alabama | 38.95 | 45 | 12.00% |
| Montana | 38.33 | 46 | 10.00% |
| Kansas | 38.13 | 47 | 8.00% |
| Maine | 36.5 | 48 | 6.00% |
| Utah | 33.64 | 49 | 4.00% |
| Massachusetts | 29.87 | 50 | 2.00% |
| Connecticut | 28.58 | 51 | 0.00% |

**Supplement Figure 1. Trends in Ten-year Age Groups Age-adjusted Mortality Rates per 100,000 Individuals for Hypertensive Nephrosclerosis in Older Adults (≥65) in the United States from 1999 to 2020**


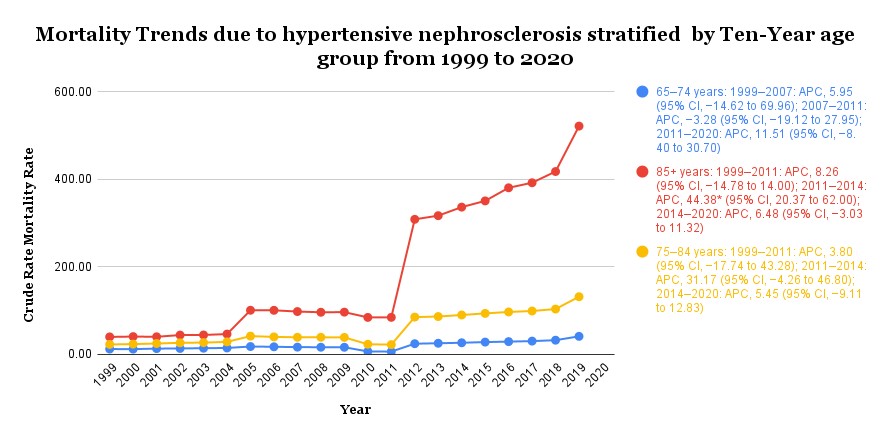


APC: Annual Percentage Change; CI: Confidence Interval
* indicates the value significantly differs from zero at alpha = 0.05

**Supplement Figure 2. Trends in Hypertensive Nephrosclerosis Stratified by Renal Failure Age-adjusted Mortality Rates per 100,000 Individuals in Older Adults (≥65) in the United States from 1999 to 2020**


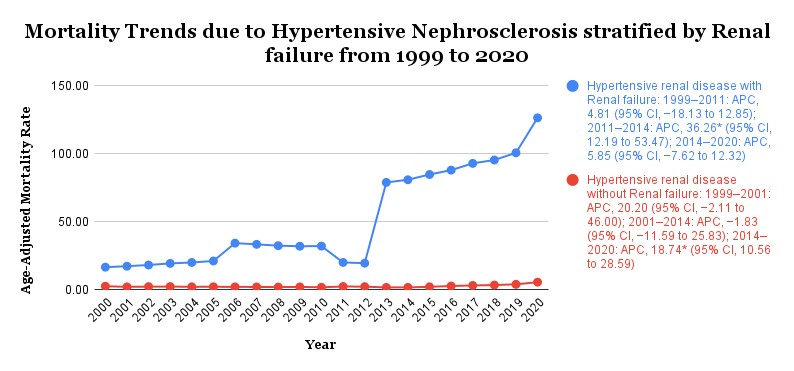


APC: Annual Percentage Change; CI: Confidence Interval
* indicates the value significantly differs from zero at alpha = 0.05
